# Supplementary material for: Computational Design, Synthesis, and Pharmacological Evaluation of Naproxen-Guaiacol Chimera for Gastro-Sparing Anti-Inflammatory Response by Selective COX2 Inhibition
Source: MDPI journal article supplement (doi:10.3390/molecules27206905), 2022-10-14
Supplement: s1 [file s1]

## Article

# Anti-Inflammatory Activity of Naproxen-Guaiacol Chimera: Pharmacological Evaluation, Molecular Dynamics, and Predicted Toxicity

Pottathil Shinu <sup>1,\*</sup>, Manu Sharma <sup>2,\*</sup>, Giridhari Lal Gupta <sup>3</sup>, Somdutt Mujwar <sup>4</sup>, Mahmoud Kandeel <sup>5</sup>, Manish Kumar<sup>6</sup>, Anroop B. Nair <sup>7</sup>, Manoj Goyal <sup>8</sup>, Purna Singh <sup>9</sup>, Mahesh Attimarad <sup>7</sup>, Katharigatta N. Venugopala <sup>7,10</sup>, Sreeharsha Nagaraja <sup>7,11</sup>, Mallikarjun Telsang <sup>12</sup>, Bandar E Aldhubiab <sup>7</sup> and Mohamed A. Morsy <sup>7,13</sup>

<sup>1</sup> Department of Biomedical Sciences, College of Clinical Pharmacy, King Faisal University, Al-Ahsa 31982, Saudi Arabia

<sup>2</sup> Department of Chemistry, National Forensic Sciences University Delhi Campus, New Delhi 110085, India

<sup>3</sup> Department of Pharmaceutics, School of Pharmacy and Technology Management, SVKM's NMIMS University, Shirpur 425405, India

<sup>4</sup> Department of Pharmaceutics, Chitkara College of Pharmacy, Chitkara University, Rajpura 140401, India

<sup>5</sup> Department of Biomedical Sciences, College of Veterinary Medicine, King Faisal University, Al-Ahsa 31982, Saudi Arabia

<sup>6</sup> Department of Pharmaceutics, M.M College of Pharmacy, Maharishi Markandeshwar (Deemed to be University) Ambala 133201, India

<sup>7</sup> Department of Pharmaceutical Sciences, College of Clinical Pharmacy, King Faisal University, Al-Ahsa 31982, Saudi Arabia

<sup>8</sup> Department of Anesthesia Technology, College of Applied Medical Sciences in Jubail, Imam Abdul Rahman Bin Faisal University, Jubail 35816, Saudi Arabia

<sup>9</sup> Department of Physiology, College of Medicine, Saint James School of medicine, Anguilla 3872

<sup>10</sup> Department of Biotechnology and Food Science, Faculty of Applied Sciences, Durban University of Technology, Durban 4000, South Africa

<sup>11</sup> Department of Pharmaceutical Chemistry, Vidya Siri College of Pharmacy, Off Sarjapura Road, Bangalore 560035, India

<sup>12</sup> Department of Surgery, College of Medicine, King Faisal University, Al-Ahsa 31982, Saudi Arabia

<sup>13</sup> Department of Pharmacology, Faculty of Medicine, Minia University, El-Minia 61511, Egypt

\* Correspondence: [spottathail@kfu.edu.sa](mailto:spottathail@kfu.edu.sa) (P.S.); Tel.: +966-551732794; [lantadene@hotmail.com](mailto:lantadene@hotmail.com) (M.S.)

**Table S1.**  $^1\text{H}$  and  $^{13}\text{C}$  NMR interpretation of synthesized *S*-naproxen-4-allylguaiacol chimera MASS-1696 (2).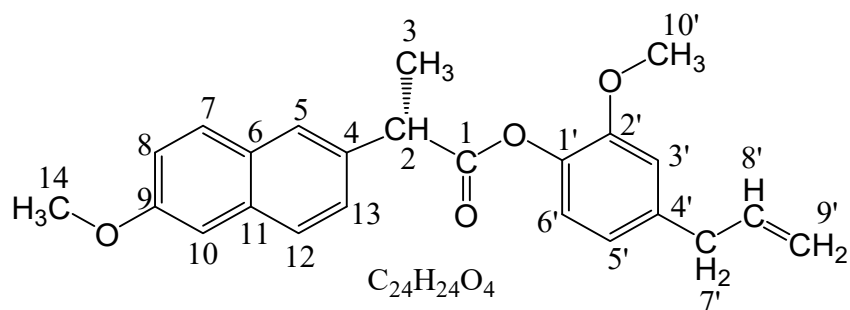

| Hydrogen (s) | $\delta$ , ppm at 400 MHz                   | Carbon (s) | $\delta$ , ppm at 100 MHz | Carbon (s) | $\delta$ , ppm at 100 MHz |
|--------------|---------------------------------------------|------------|---------------------------|------------|---------------------------|
| H-7          | 7.7910–7.7935 (1H, d, $J$ = 1.00 Hz)        | C-1        | 172.90                    | C-5'       | 120.62                    |
| H-12 & H-5   | 7.7165–7.7491 (2H, m)                       | C-9        | 157.64                    | C-8        | 118.94                    |
| H-13         | 7.5080–7.5338 (1H, dd, $J$ = 8.56 & 1.8 Hz) | C-2'       | 150.95                    | C-9'       | 116.08                    |
| H-8          | 7.1560–7.1623 (1H, d, $J$ = 2.52 Hz)        | C-8'       | 138.87                    | C-3'       | 112.79                    |
| H-10         | 7.1347 (1H, s)                              | C-1'       | 138.20                    | C-10       | 105.61                    |
| H-6'         | 6.8225–6.8423 (1H, d, $J$ = 7.92 Hz)        | C-4'       | 137.11                    | C-10'      | 55.73                     |
| H-3' & H-5'  | 6.6863–6.7236 (2H, m)                       | C-4        | 135.47                    | C-14       | 55.33                     |
| H-8'         | 5.8742–5.9753 (1H, m)                       | C-11       | 133.75                    | C-8'       | 45.35                     |
| H-9'         | 5.0410–5.0929 (1H, m)                       | C-7        | 129.34                    | C-2        | 40.06                     |
| H-2          | 4.1020–4.1554 (1H, q)                       | C-6        | 128.98                    | C-3        | 18.84                     |
| H-14         | 3.9197 (3H, s)                              | C-12       | 127.06                    |            |                           |

|       |                                      |      |        |
|-------|--------------------------------------|------|--------|
| H-10' | 3.6580 (3H, s)                       | C-5  | 126.51 |
| H-7'  | 3.3292–3.3458 (2H, d, $J = 6.64$ Hz) | C-13 | 126.25 |
| H-3   | 1.6782–1.6959 (3H, d, $J = 7.08$ Hz) | C-6' | 122.33 |

**Table S2.** Powder XRD results of MAS-1696 (**2**).*Measurement Conditions:* (Bookmark 1)

|                         |                                                                                                                                                                                                                                                                                                                                                  |
|-------------------------|--------------------------------------------------------------------------------------------------------------------------------------------------------------------------------------------------------------------------------------------------------------------------------------------------------------------------------------------------|
| Dataset Name            | EUG                                                                                                                                                                                                                                                                                                                                              |
| File name               | C:\X'Pert Data\JULY2012\EUG.xrdml                                                                                                                                                                                                                                                                                                                |
| Comment                 | Configuration=Reflection Spinner Stage, Owner=jagtar, Creation date=12/6/2007 10:50:59 AM<br>Goniometer=PW3050/60 (Theta/Theta); Minimum step size 2Theta:0.001; Minimum step size Omega:0.001<br>Sample stage=Spinner PW3064<br>Diffractometer system=XPRT-PRO<br>Measurement program=Spinner, Owner=jagtar, Creation date=1/9/2008 11:57:34 AM |
| Measurement Date / Time | 7/9/2012 1:08:43 PM                                                                                                                                                                                                                                                                                                                              |
| Operator                | Panjab University                                                                                                                                                                                                                                                                                                                                |
| Raw Data Origin         | XRD measurement (*.XRDML)                                                                                                                                                                                                                                                                                                                        |
| Scan Axis               | Gonio                                                                                                                                                                                                                                                                                                                                            |
| Start Position [°2Th.]  | 5.0084                                                                                                                                                                                                                                                                                                                                           |
| End Position [°2Th.]    | 49.9904                                                                                                                                                                                                                                                                                                                                          |
| Step Size [°2Th.]       | 0.0170                                                                                                                                                                                                                                                                                                                                           |
| Scan Step Time [s]      | 25.1954                                                                                                                                                                                                                                                                                                                                          |
| Scan Type               | Continuous                                                                                                                                                                                                                                                                                                                                       |

---

|                               |                  |
|-------------------------------|------------------|
| PSD Mode                      | Scanning         |
| PSD Length [°2Th.]            | 2.12             |
| Offset [°2Th.]                | 0.0000           |
| Divergence Slit Type          | Fixed            |
| Divergence Slit Size [°]      | 0.4785           |
| Specimen Length [mm]          | 10.00            |
| Measurement Temperature [°C]  | 25.00            |
| Anode Material                | Cu               |
| K-Alpha1 [Å]                  | 1.54060          |
| K-Alpha2 [Å]                  | 1.54443          |
| K-Beta [Å]                    | 1.39225          |
| K-A2 / K-A1 Ratio             | 0.50000          |
| Generator Settings            | 40 mA, 45 kV     |
| Diffractometer Type           | 0000000011023505 |
| Diffractometer Number         | 0                |
| Goniometer Radius [mm]        | 240.00           |
| Dist. Focus-Diverg. Slit [mm] | 91.00            |
| Incident Beam Monochromator   | No               |
| Spinning                      | No               |

**Main Graphics, Analyze View:** (Bookmark 2)**Peak List:** (Bookmark 3)

| Pos.<br>[°2Th.] | FWHM<br>[°2Th.] | d-spacing<br>[Å] | Rel. Int.<br>[%] | Area<br>[cts*°2Th.] |
|-----------------|-----------------|------------------|------------------|---------------------|
| 5.3660          | 0.1004          | 16.46937         | 17.85            | 82.98               |
| 9.0120          | 0.1506          | 9.81286          | 68.44            | 477.21              |
| 10.1531         | 0.1338          | 8.71249          | 96.82            | 600.08              |
| 10.7588         | 0.1171          | 8.22327          | 19.16            | 103.90              |
| 11.7924         | 0.1338          | 7.50476          | 21.96            | 136.09              |
| 13.7934         | 0.1338          | 6.42023          | 45.22            | 280.28              |
| 14.8946         | 0.2342          | 5.94792          | 1.78             | 19.31               |
| 15.9789         | 0.1171          | 5.54669          | 7.04             | 38.18               |
| 16.1809         | 0.0669          | 5.47788          | 4.17             | 12.92               |
| 16.7101         | 0.0836          | 5.30558          | 22.05            | 85.40               |
| 16.9541         | 0.1004          | 5.22975          | 44.21            | 205.51              |
| 17.2490         | 0.1338          | 5.14102          | 95.42            | 591.35              |
| 18.0868         | 0.1004          | 4.90473          | 72.92            | 338.94              |
| 18.3634         | 0.1171          | 4.83145          | 29.24            | 158.57              |
| 18.6952         | 0.1004          | 4.74646          | 23.84            | 110.82              |
| 18.8301         | 0.1171          | 4.71276          | 27.90            | 151.28              |
| 19.0783         | 0.0836          | 4.65202          | 9.96             | 38.59               |
| 20.1505         | 0.1004          | 4.40682          | 15.88            | 73.81               |
| 20.5282         | 0.1004          | 4.32659          | 15.23            | 70.78               |
| 20.7993         | 0.1506          | 4.27081          | 31.65            | 220.65              |

---

|         |        |         |        |        |
|---------|--------|---------|--------|--------|
| 21.6368 | 0.1338 | 4.10735 | 12.13  | 75.15  |
| 21.9301 | 0.1004 | 4.05308 | 12.07  | 56.10  |
| 22.6423 | 0.0669 | 3.92717 | 23.88  | 74.00  |
| 23.3245 | 0.1673 | 3.81384 | 100.00 | 774.70 |
| 23.5238 | 0.0669 | 3.78198 | 46.91  | 145.37 |
| 23.7278 | 0.0669 | 3.74991 | 24.12  | 74.73  |
| 24.0784 | 0.1171 | 3.69610 | 11.64  | 63.13  |
| 25.1489 | 0.1004 | 3.54115 | 11.88  | 55.21  |
| 25.4713 | 0.1338 | 3.49706 | 8.58   | 53.19  |
| 26.1536 | 0.1338 | 3.40735 | 8.85   | 54.86  |
| 26.5279 | 0.1673 | 3.36012 | 5.64   | 43.69  |
| 27.2418 | 0.1338 | 3.27367 | 6.57   | 40.75  |
| 27.7894 | 0.3346 | 3.21039 | 15.36  | 238.01 |
| 27.9888 | 0.1004 | 3.18797 | 11.82  | 54.95  |
| 28.4631 | 0.1338 | 3.13592 | 8.37   | 51.87  |
| 29.3875 | 0.1673 | 3.03934 | 9.26   | 71.70  |
| 29.6399 | 0.1004 | 3.01404 | 12.49  | 58.05  |
| 31.0445 | 0.1673 | 2.88080 | 6.94   | 53.74  |
| 32.1516 | 0.1673 | 2.78408 | 3.89   | 30.11  |
| 32.9380 | 0.1338 | 2.71939 | 6.10   | 37.81  |
| 33.4897 | 0.1338 | 2.67584 | 4.48   | 27.74  |
| 34.5796 | 0.3346 | 2.59396 | 2.89   | 44.79  |
| 35.6109 | 0.3346 | 2.52117 | 1.15   | 17.88  |
| 37.8832 | 0.2342 | 2.37501 | 3.03   | 32.90  |
| 38.7888 | 0.3346 | 2.32162 | 1.12   | 17.36  |
| 41.2369 | 0.2007 | 2.18927 | 2.19   | 20.38  |
| 42.1400 | 0.2007 | 2.14442 | 1.91   | 17.76  |

|         |        |         |      |       |
|---------|--------|---------|------|-------|
| 44.0912 | 0.4015 | 2.05394 | 2.00 | 37.27 |
| 44.8442 | 0.2676 | 2.02119 | 2.19 | 27.18 |
| 46.3187 | 0.4015 | 1.96023 | 1.73 | 32.14 |
| 47.3228 | 0.4896 | 1.91936 | 1.88 | 57.65 |

**Table S3.** Binding score and interacting residues of the designed chimera MAS-1696 against various anti-inflammatory drug targets.

| Name                 | Structure                                                                         | 15-LOX2 (7laf)                                                                                         | 5-LOX (6n2w)                                                           | ROR (6q7a)                                                                                     | COX2 (5ikr)                                                                                                    | COX1 (3kk6)                                                  |
|----------------------|-----------------------------------------------------------------------------------|--------------------------------------------------------------------------------------------------------|------------------------------------------------------------------------|------------------------------------------------------------------------------------------------|----------------------------------------------------------------------------------------------------------------|--------------------------------------------------------------|
| MAS-1696             | 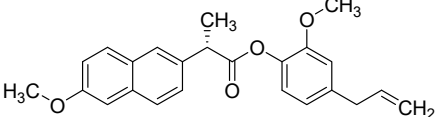 | -6.17                                                                                                  | -5.23                                                                  | -8.86                                                                                          | -9.20                                                                                                          | -5.2                                                         |
| Interacting Residues |                                                                                   | Leu609, Phe184, Leu610, Leu420, Ile412, Asp413, His378, Ala416, Ile676, Leu415, Leu419, Ala188, Tyr185 | Phe359, His600, Val604, His432, Arg596, Leu414, His372, His367, Leu368 | Phe401, Ile400, Ile347, His479, Leu483, Cys393, Trp317, Cys320, Leu391, Val376, Met365, His323 | Val116, Leu352, Tyr355, Leu359, Phe518, Met522, Val523, Trp387, Ala527, Tyr348, Tyr385, Ser530, Val349, Gly526 | His90, Asn515, His581, Gly354, Gln350, Gln351, Gln192, Tyr94 |

**Table S4.** Physicochemical and toxicological profiling of designed ligand and naproxen.

| Properties     | Descriptor                                  | MAS-1696 | Naproxen |
|----------------|---------------------------------------------|----------|----------|
| MW             | (g/mol)                                     | 376.452  | 230.263  |
| LogP           | -                                           | 5.2946   | 3.0365   |
| Rotatable bond | -                                           | 7        | 3        |
| HBA            | -                                           | 4        | 2        |
| HBD            | -                                           | 0        | 1        |
| TPSA           | (Å) <sup>2</sup>                            | 164.902  | 99.642   |
| Absorption     | Water solubility (mol/L)                    | -6.715   | -3.319   |
|                | Caco2 permeability                          | 1.069    | 1.304    |
|                | Intestinal absorption (%) (human)           | 96.351   | 96.879   |
|                | Skin Permeability (Log Kp)                  | -2.699   | -2.72    |
|                | P-glycoprotein substrate                    | No       | No       |
|                | P-glycoprotein I inhibitor                  | Yes      | No       |
|                | P-glycoprotein II inhibitor                 | Yes      | No       |
| Distribution   | VDss (human)                                | -0.047   | -0.693   |
|                | Fraction unbound (human)                    | 0.03     | 0.065    |
|                | BBB permeability                            | 0.104    | 0.117    |
|                | CNS permeability                            | -1.274   | -1.4     |
| Metabolism     | CYP2D6 substrate                            | No       | Yes      |
|                | CYP3A4 substrate                            | Yes      | No       |
|                | CYP1A2 inhibitor                            | Yes      | No       |
|                | CYP2C19 inhibitor                           | Yes      | No       |
|                | CYP2C9 inhibitor                            | Yes      | No       |
|                | CYP2D6 inhibitor                            | No       | No       |
|                | CYP3A4 inhibitor                            | Yes      | No       |
| Excretion      | Total Clearance (log ml/min/kg)             | 0.324    | 0.288    |
|                | Renal OCT2 substrate                        | No       | No       |
| Toxicity       | AMES toxicity                               | No       | No       |
|                | Max. tolerated dose (human) (log mg/kg/day) | 0.485    | 0.71     |
|                | hERG I inhibitor                            | No       | No       |



|  |                                               |       |        |
|--|-----------------------------------------------|-------|--------|
|  | hERG II inhibitor                             | Yes   | No     |
|  | Oral Rat Acute Toxicity (LD50) (mol/kg)       | 2.57  | 3.055  |
|  | Oral Rat Chronic Toxicity (LOAEL) (mg/kg/day) | 2.028 | 2.333  |
|  | Hepatotoxicity                                | No    | No     |
|  | Skin Sensitisation                            | No    | No     |
|  | T. Pyriformis toxicity (mg/L)                 | 0.392 | 0.339  |
|  | Minnow toxicity                               | -1.8  | -0.045 |

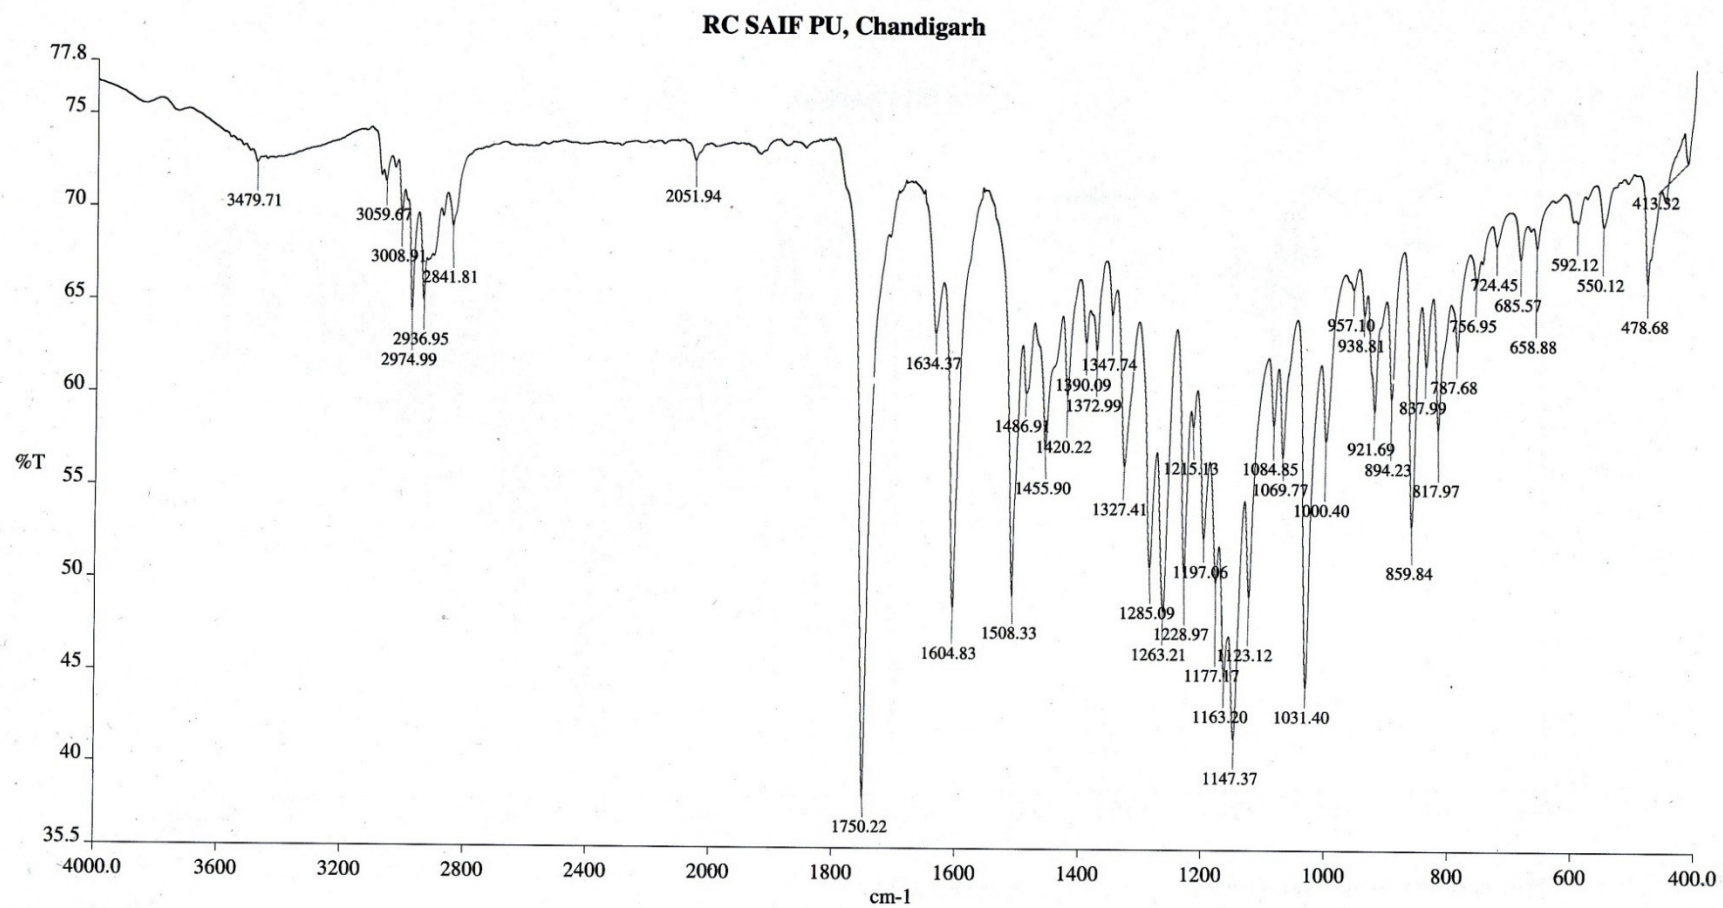

Spectrum Name: Sharad Kumar-3.sp

Description: EUG

Date Created: wed nov 16 15:42:31 2011 India Standard Time (GMT+5:30)

Figure S1. FT-IR spectrum of MAS-1696 (2).

<sup>1</sup>H NMR spectrum of compound 1 in CDCl<sub>3</sub>. The spectrum shows several multiplets and singlets in the aromatic region (6.6-7.8 ppm) and a solvent peak at 7.254 ppm. Integration values are provided below the baseline.

| Chemical Shift (ppm)                           | Integration |
|------------------------------------------------|-------------|
| 7.7935, 7.7910, 7.7491, 7.7378, 7.7280, 7.7165 | 1.02, 2.05  |
| 7.5338, 7.5294, 7.5125, 7.5080                 | 1.03        |
| 7.2540 (CDCl <sub>3</sub> )                    | -           |
| 7.1623, 7.1560, 7.1347, 7.1286                 | 2.04        |
| 6.8428, 6.8225                                 | 1.01        |
| 6.7236, 6.7198, 6.7107, 6.7066, 6.6907, 6.6863 | 2.04        |

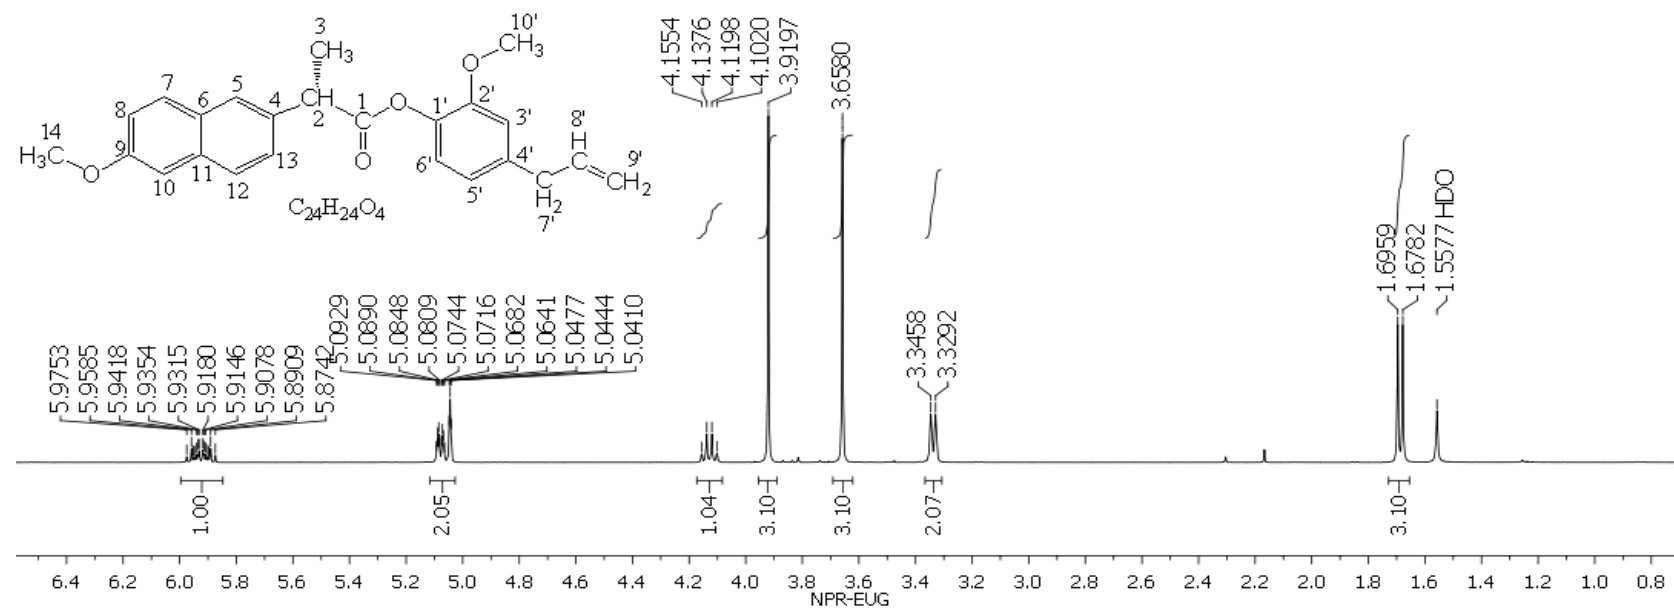

**Figure S2.**  $^1\text{H}$  NMR spectrum of MAS-1696 (**2**) in  $\text{CDCl}_3$ ; Molecular Formula:  $\text{C}_{24}\text{H}_{24}\text{O}_4$ .

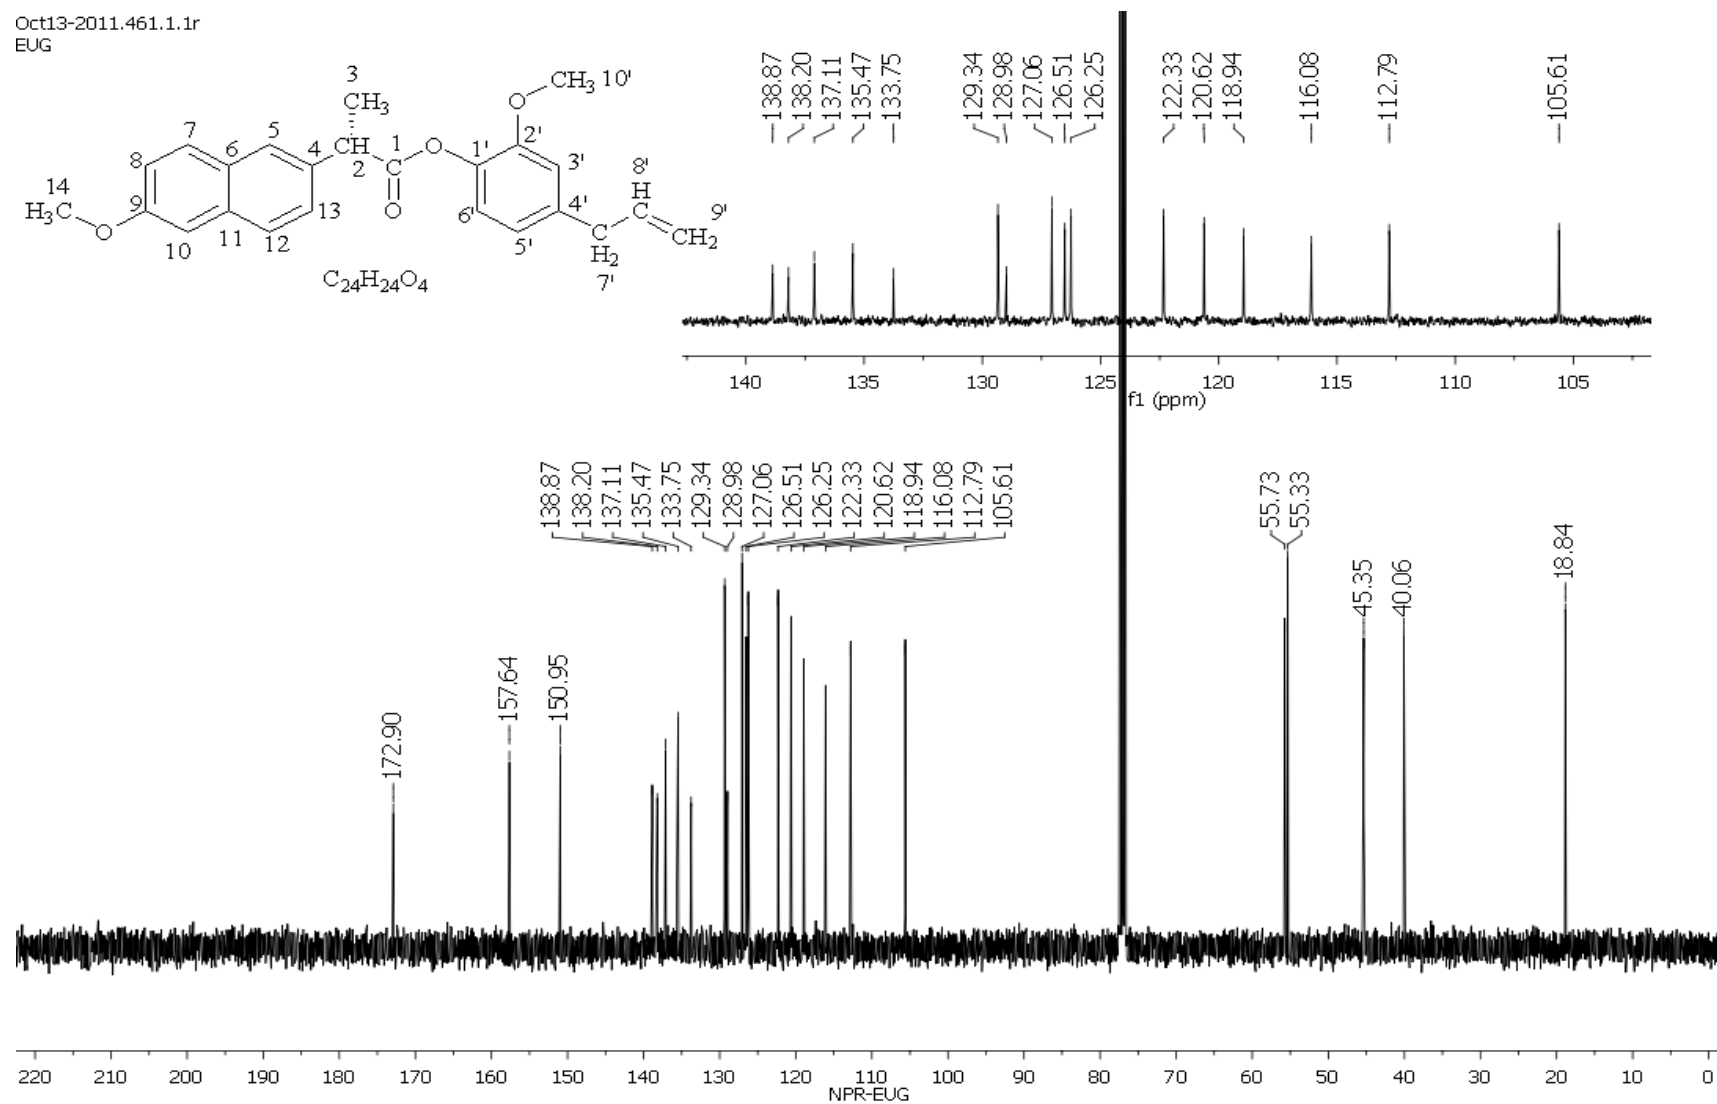

**Figure S3.**  $^{13}C$  NMR spectrum of MAS-1696 (2) in  $CDCl_3$ ; Molecular Formula:  $C_{24}H_{24}O_4$ . All the 24 carbons/peaks are visible in the spectrum.

## MS Spectrum

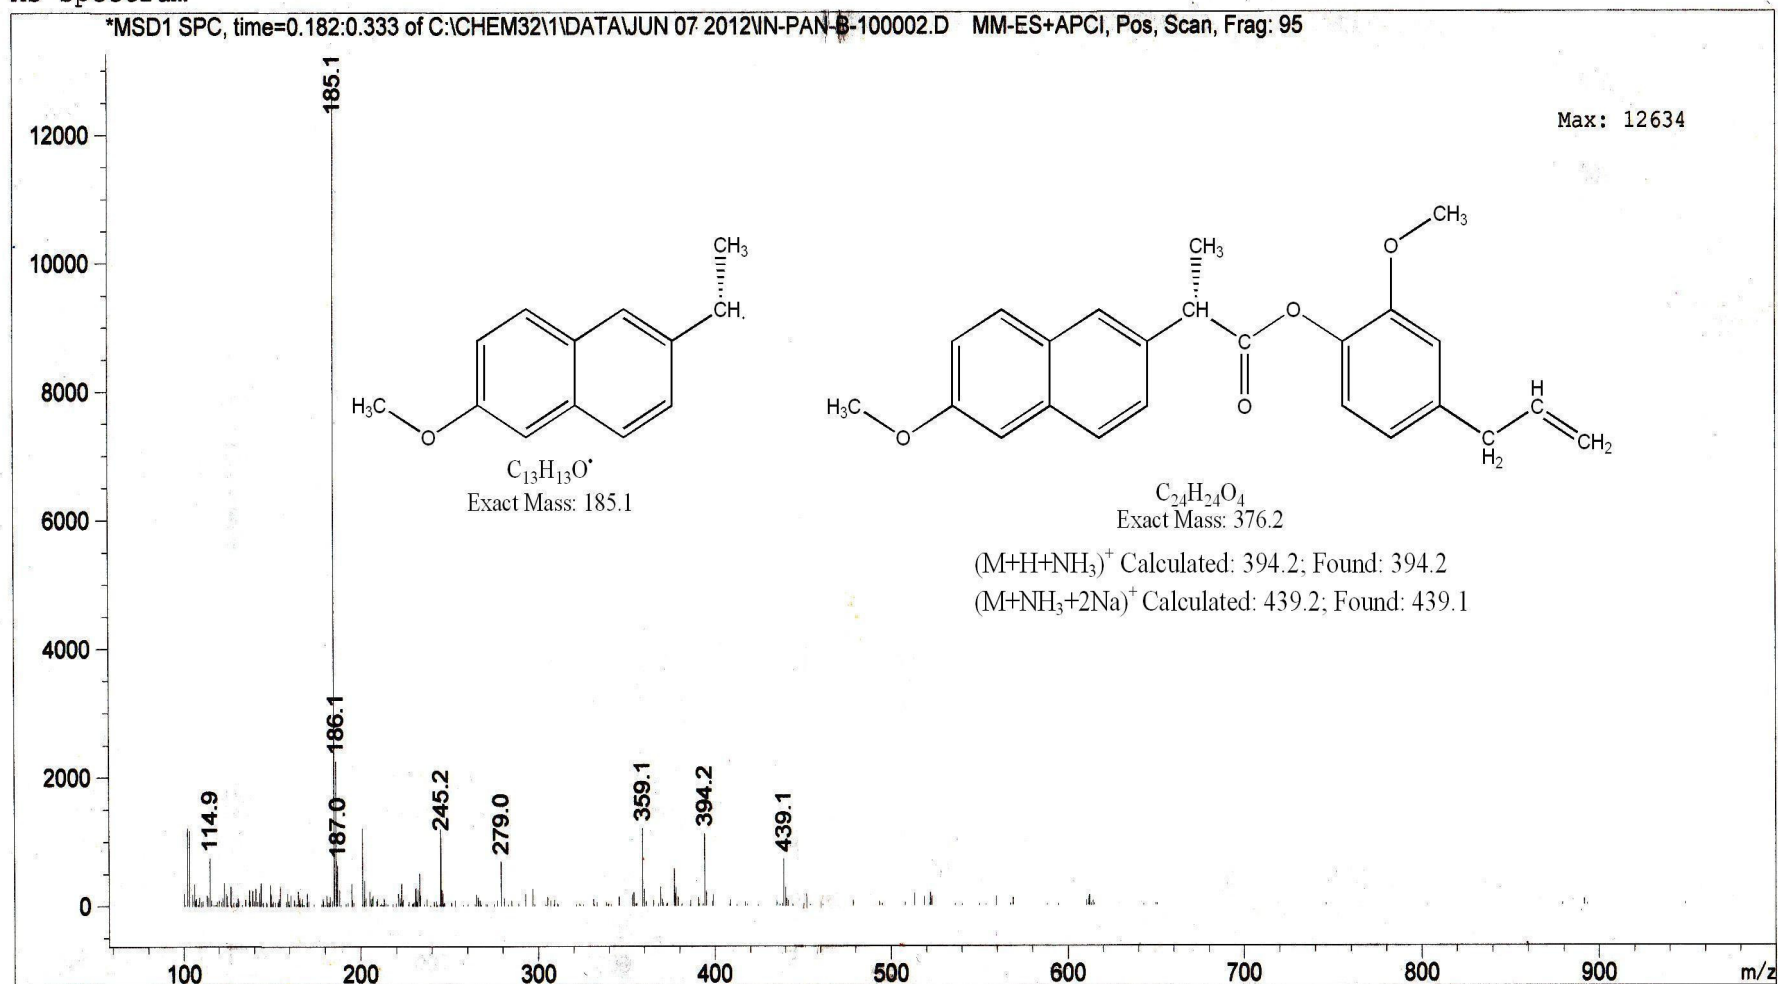

Figure S4. ESI-MS spectrum of MAS-1696 (2); Exact Mass  $(M+H+NH_3)^+$ : 394.2; Found: 394.2.

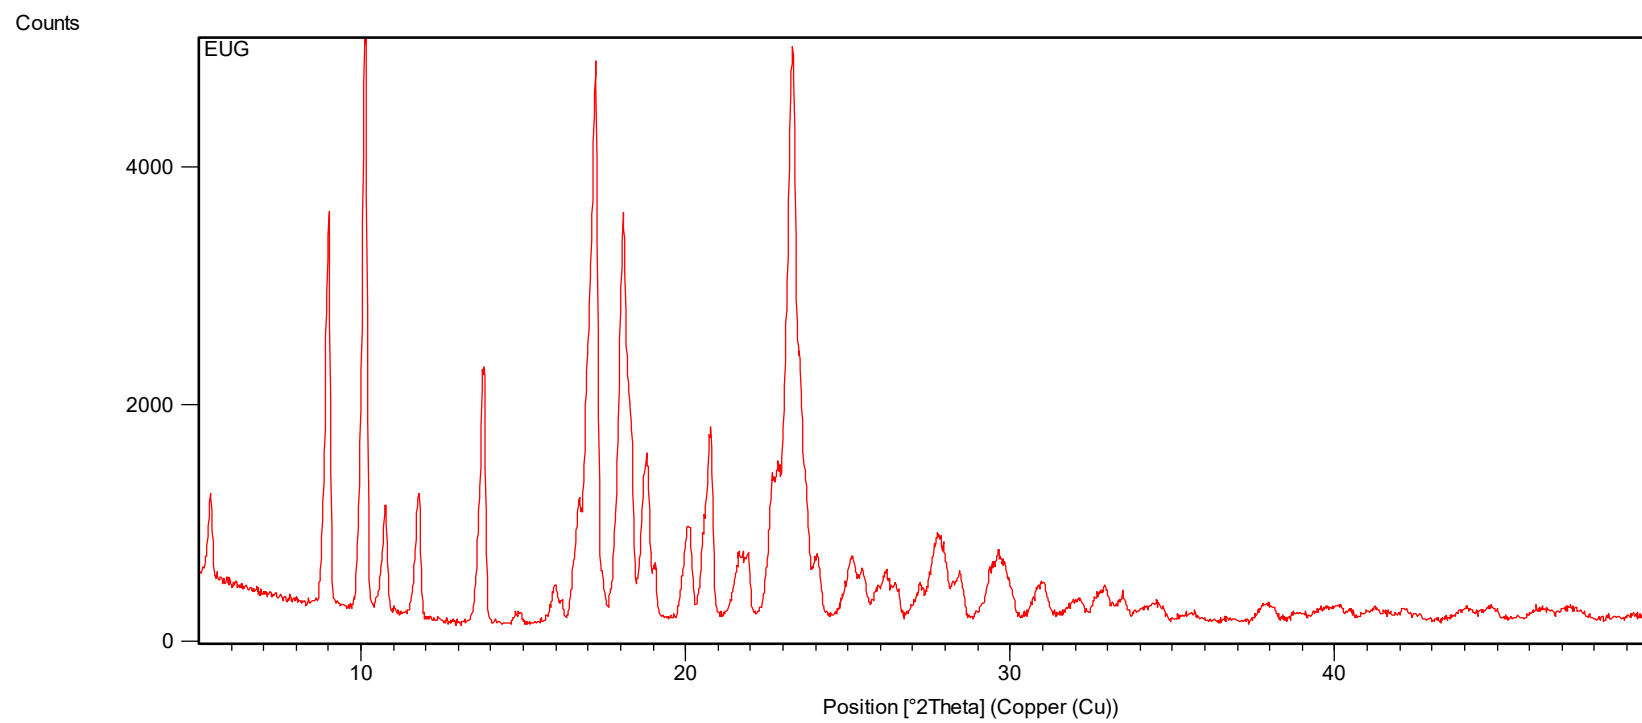

**Figure S5.** Powder XRD-pattern of MAS-1696 (2).

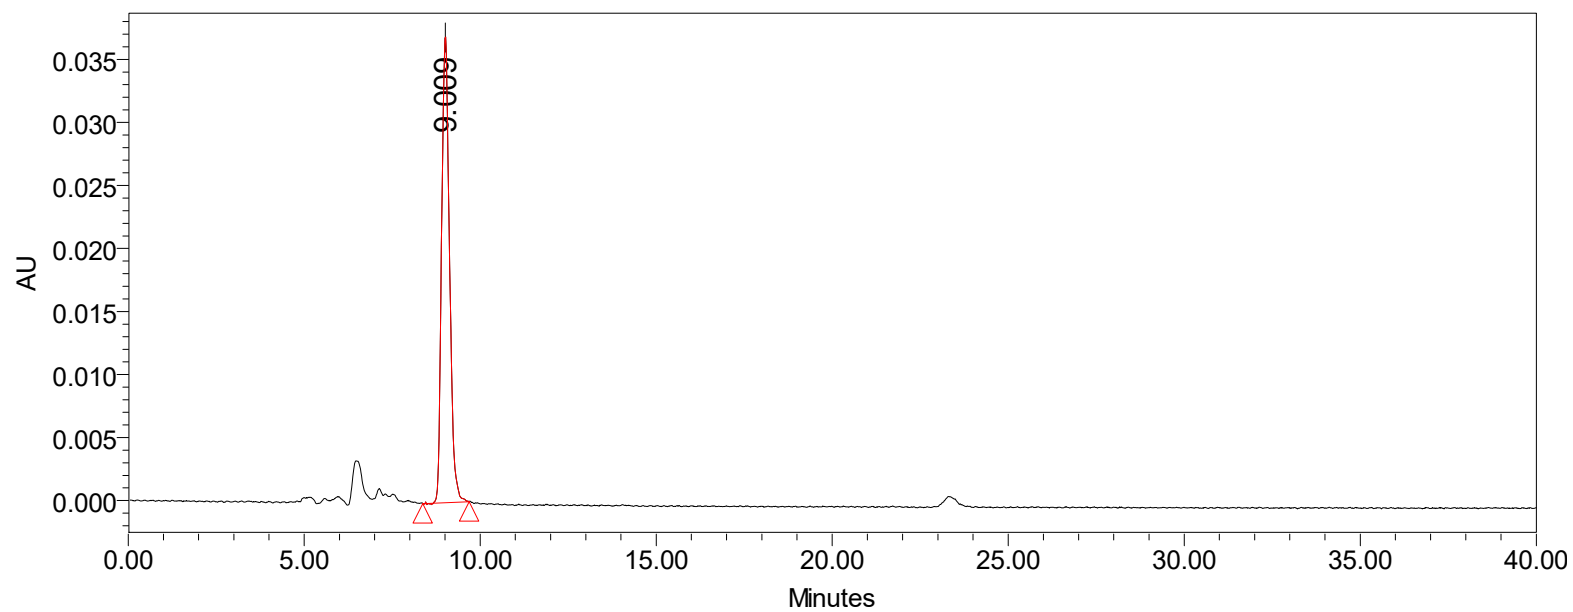

**Figure S6.** HPLC chromatogram of MAS-1996 ( $t_R$  9.009 min).
